# Supplementary material for: Hypothermia Prevents Cardiac Dysfunction during Acute Ischemia Reperfusion by Maintaining Mitochondrial Bioenergetics and by Promoting Hexokinase II Binding to Mitochondria
Source: Hindawi journal article supplement (doi:10.1155/2022/4476448), 2022-01-01
Supplement: f1 [file 4476448.f1.pdf]

| <b>Time (min REP)</b>      | <b>TC</b>   | <b>IR</b>   | <b>IR+CP</b> | <b>IR+H</b>               | <b>IR+HCP</b>            |
|----------------------------|-------------|-------------|--------------|---------------------------|--------------------------|
| <i>dP/dt<sub>max</sub></i> |             |             |              |                           |                          |
| (mmHg/min)                 |             |             |              |                           |                          |
| 5                          | 3420 ± 111  | 379 ± 156*  | 1524 ± 46*#  | 2748 ± 105*# <sup>§</sup> | 3320 ± 157# <sup>§</sup> |
| 20                         | 3748 ± 110  | 356 ± 79*   | 1778 ± 118*# | 2950 ± 84*# <sup>§</sup>  | 3595 ± 185# <sup>§</sup> |
| <i>dP/dt<sub>min</sub></i> |             |             |              |                           |                          |
| (mmHg/min)                 |             |             |              |                           |                          |
| 5                          | -3250 ± 84  | -340 ± 131* | -1290 ± 94*# | -1781 ± 108*#             | -3200 ± 157#             |
| 20                         | -3145 ± 120 | -350 ± 75*  | -1300 ± 66*# | -1893 ± 108*#             | -3022 ± 58#              |
