# Supplementary material for: Hypothermia Prevents Cardiac Dysfunction during Acute Ischemia Reperfusion by Maintaining Mitochondrial Bioenergetics and by Promoting Hexokinase II Binding to Mitochondria
Source: Hindawi journal article supplement (doi:10.1155/2022/4476448), 2022-01-01

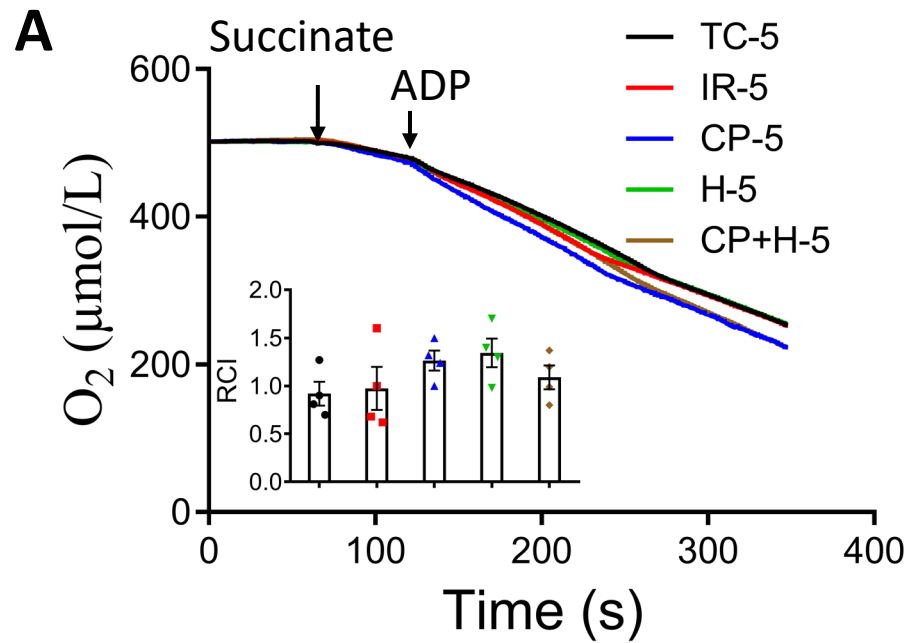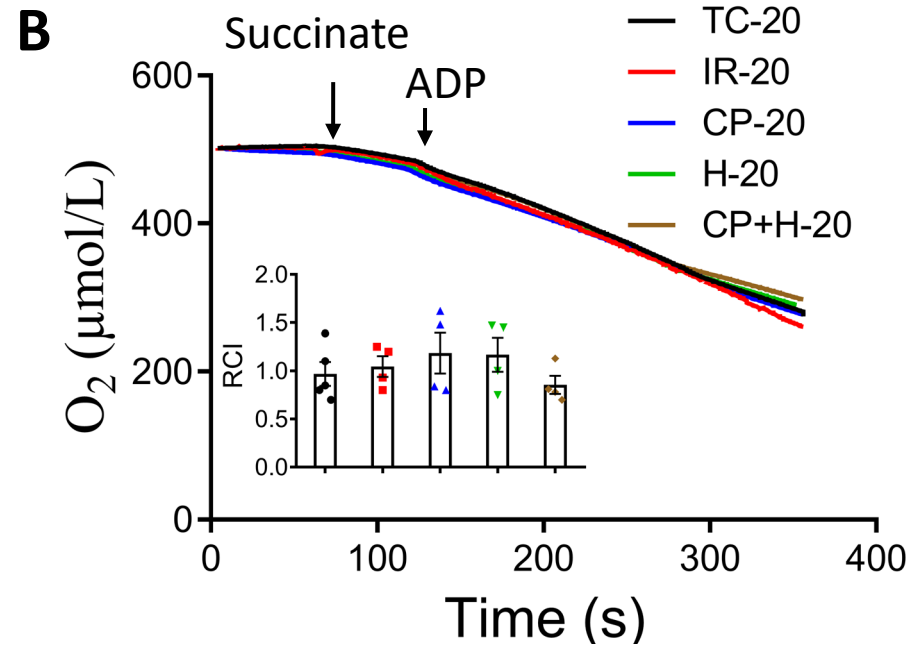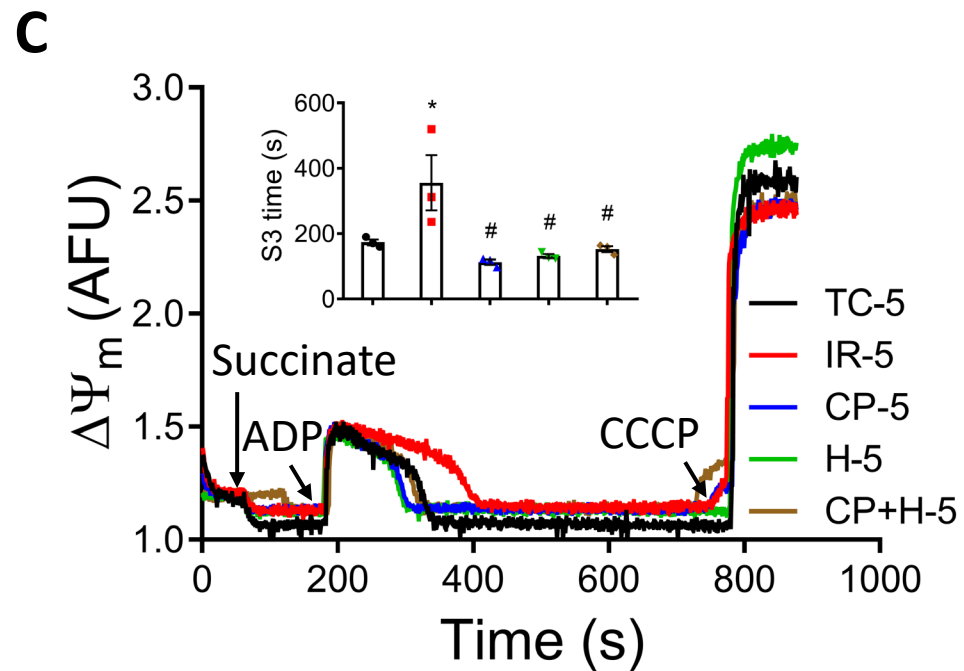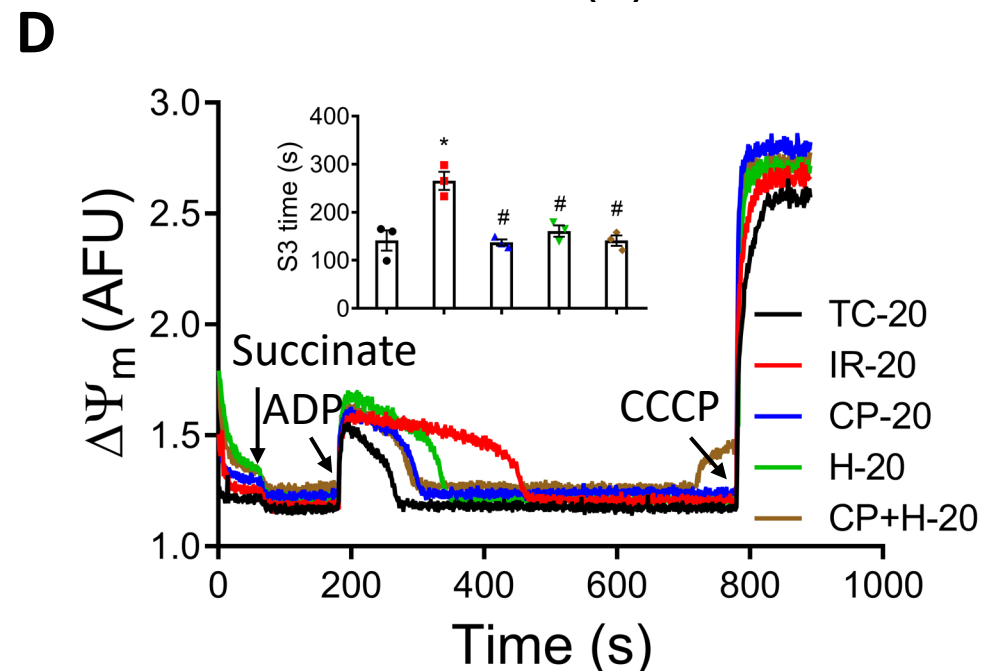

Supplement: f3 [file 4476448.f3.pdf]
